# Supplementary material
Source: publisher figshare collection journal article supplement (https://tandf.figshare.com/ndownloader/files/17208074)
Supplement: Supplementary file 1 [file 17208074]

| **Environment** | **Gene sequenced** | **Species** | **GenBank accession number** |
| --- | --- | --- | --- |
| Bakery | Calmodulin | *A. fumigatus* sensu stricto | MK133063 |
| Bakery | Calmodulin | *A. clavatus* sensu stricto | MK133076 |
| Dairy farm | Calmodulin | *A. fumigatus* sensu stricto | MK133077 |
| Dairy farm | Calmodulin | *A. fumigatus* sensu stricto | MK133078 |
| Dairy farm | Calmodulin | *A. fumigatus* sensu stricto | MK133079 |
| Faculty | Calmodulin | *A. fumigatus* sensu stricto | MK133059 |
| Faculty | Calmodulin | *A. fumigatus* sensu stricto | MK133060 |
| Faculty | Calmodulin | *A. fumigatus* sensu stricto | MK133080 |
| Faculty | Calmodulin | *A. fumigatus* sensu stricto | MK133074 |
| Taxi | β-tubulin | *A. niger* sensu stricto | MK133053 |
| Taxi | Calmodulin | *A. fumigatus* sensu stricto | MK133056 |
| Taxi | Calmodulin | *A. fumigatus* sensu stricto | MK133057 |
| Waste industry | Calmodulin | *A. tubingensis* | MK133082 |
| Waste industry | β-tubulin | *A. tubingensis* | MK133046 |
| Waste industry | β-tubulin | *A. tubingensis* | MK133047 |
| Waste industry | β-tubulin | *A. tubingensis* | MK133048 |
| Waste industry | β-tubulin | *A. tubingensis* | MK133049 |
| Waste industry | β-tubulin | *A. tubingensis* | MK133050 |
| Waste industry | β-tubulin | *A. niger* sensu stricto | MK133052 |
| Waste industry | Calmodulin | *A. fumigatus* sensu stricto | MK133084 |
| Dwellings | Calmodulin | *A. fumigatus* sensu stricto | MK133054 |
| Dwellings | Calmodulin | *A. fumigatus* sensu stricto | MK133055 |
| Dwellings | Calmodulin | *A. fumigatus* sensu stricto | MK133061 |
| Dwellings | Calmodulin | *A. sydowii* | MK133062 |
| Dwellings | Calmodulin | *A. welwitschiae* | MK133089 |
| Dwellings | Calmodulin | *A. welwitschiae* | MK133090 |
| Dwellings | Calmodulin | *A. fumigatus* sensu stricto | MK133067 |
| Dwellings | Calmodulin | *A. fumigatus* sensu stricto | MK133068 |
| Dwellings | Calmodulin | *A. fumigatus* sensu stricto | MK133069 |
| Dwellings | Calmodulin | *A. fumigatus* sensu stricto | MK133070 |
| Dwellings | Calmodulin | *A. fumigatus* sensu stricto | MK133071 |
| Dwellings | Calmodulin | *A. fumigatus* sensu stricto | MK133072 |
| Dwellings | Calmodulin | *A. fumigatus* sensu stricto | MK133073 |
| Dwellings | Calmodulin | *A. fumigatus* sensu stricto | MK133075 |
| Dwellings | Calmodulin | *A. fumigatus* sensu stricto | MK133081 |

Supplementary Table 1 – Accession numbers of the *Aspergillus* isolates identified by sequencing
